# Supplementary material for: LncRNA GAS5 enhanced the killing effect of NK cell on liver cancer through regulating miR-544/RUNX3
Source: PubMed Central journal article supplement — Innate Immun. 2019 Feb 6;25(2):99–109. doi: 10.1177/1753425919827632 (PMC6830859; doi:10.1177/1753425919827632), 2019-02-06
Supplement: Supplemental_Material.pdf [file Supplemental_Material.pdf]

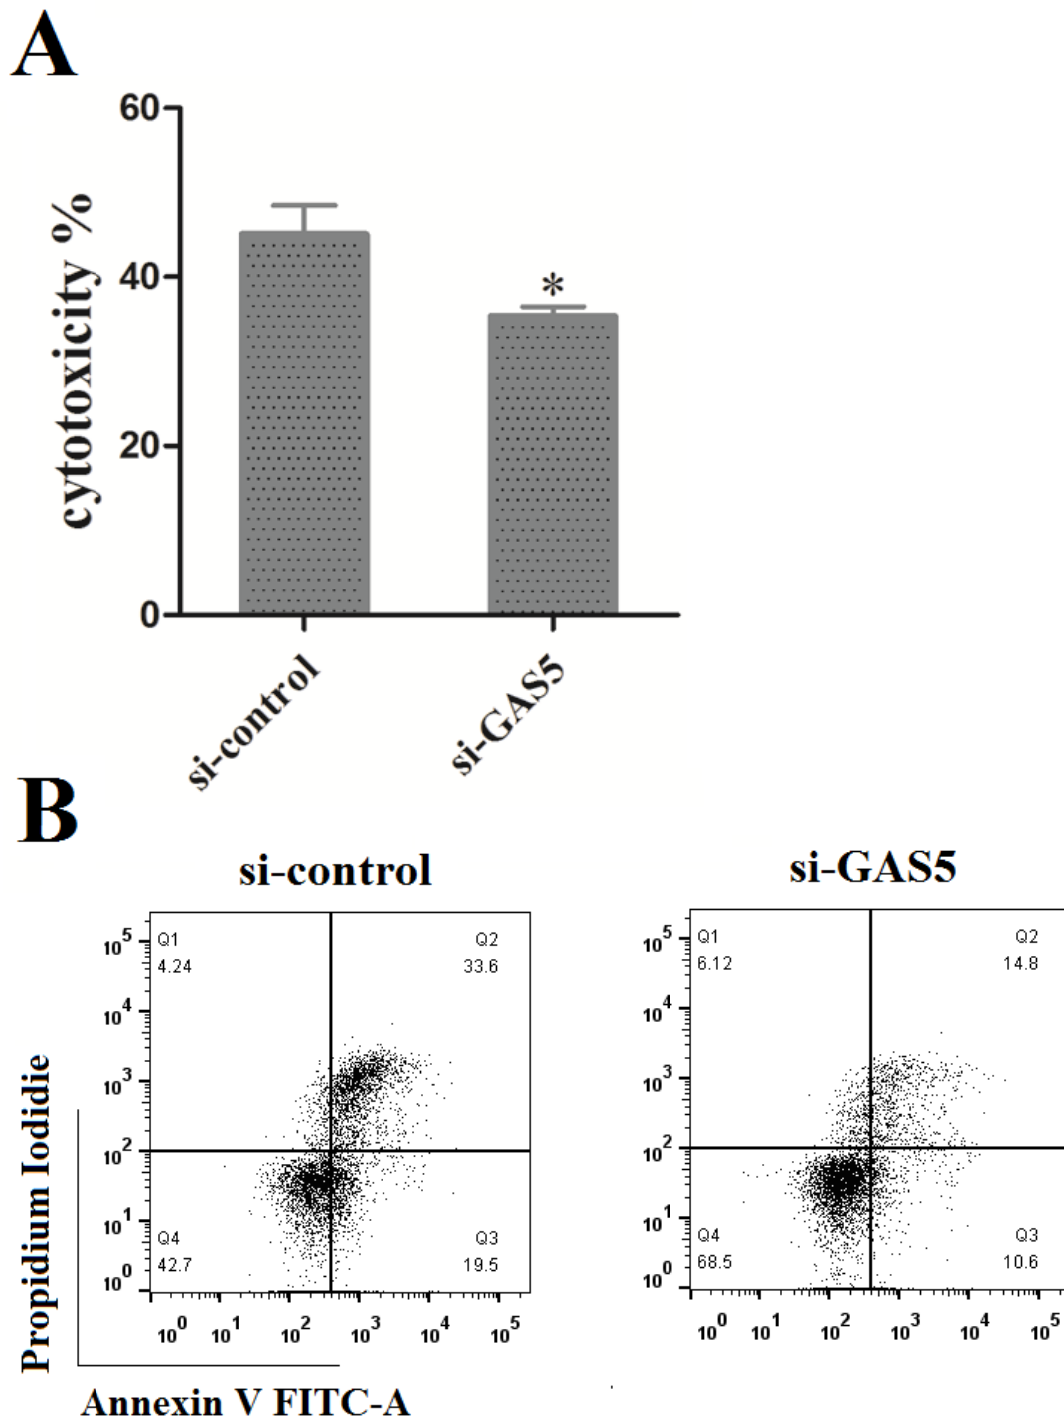

**Supplement Figure 1.** The peripheral NK cells were isolated from patients with liver cancer. Peripheral NK cells were transfected with si-GAS5 or si-control, then co-cultured with primary liver cancer cells. A. The cytotoxicity was decreased in si-GAS5 group than si-control group. B. The apoptosis rate in si-GAS5 group was reduced compared with si-control group (53.1% vs 25.4%).
